# Supplementary material
Source: HighWire-hosted journal article supplement (https://sti.bmj.com/content/95/1/46)
Supplement: inline-supplementary-material-2 [file inline-supplementary-material-2.docx]

**Table S2. Factors associated with having sex with a TGD person among 3338 females attending the Melbourne Sexual Health Centre, including 60 individuals who self-reported having sex with a TGD person but with no documented evidence in the medical notes.**

| **Factors** | **Number of individuals, *N*** | **Number of individuals who had had sex with a TGD person, *n* (%)** | **Crude OR**  **(95% CI)** | **p Value** | **Adjusted OR**  **(95% CI)** | **p Value** |
| --- | --- | --- | --- | --- | --- | --- |
| Age, years |  |  |  |  |  |  |
| *≤24* | 1,194 | 34 (2.9%) | 1 | Ref | 1 | Ref |
| *25-34* | 1,598 | 38 (2.4%) | 0.83 (0.52-1.33) | 0.439 | 0.94 (0.55-1.59) | 0.805 |
| *≥35* | 546 | 7 (1.3%) | 0.44 (1.20-1.01) | 0.052 | 0.45 (0.18-1.13) | 0.088 |
| Country of birth§ |  |  |  |  |  |  |
| *Overseas* | 2,031 | 21 (1.0%) | 1 | Ref | 1 | Ref |
| *Australia* | 1,205 | 55 (4.6%) | 4.58 (2.76-7.61) | <0.001 | 2.28 (1.32-3.965) | 0.003 |
| Injecting drug use§ |  |  |  |  |  |  |
| *No* | 3,266 | 76 (2.3%) | 1 | Ref | 1 | Ref |
| *Yes* | 21 | 2 (9.5%) | 4.42 (1.01-19.31) | 0.048 | 1.66 (0.29-9.48) | 0.570 |
| Sexual orientation |  |  |  |  |  |  |
| *Heterosexual* | 2,863 | 17 (0.6%) | 1 | Ref | 1 | Ref |
| *Lesbian or bisexual* | 450 | 62 (13.8%) | 26.75 (15.48-46.23) | <0.001 | 15.25 (8.29-28.04) | <0.001 |
| Sex workers§ |  |  |  |  |  |  |
| *No* | 2,430 | 29 (1.2%) | 1 | Ref | 1 | Ref |
| *Yes* | 820 | 48 (5.9%) | 5.15 (3.22-8.22) | <0.001 | 5.05 (2.99-8.53) | <0.001 |
| Number of partners^ |  |  |  |  |  |  |
| *≤3* | 1,941 | 20 (1.0%) | 1 | Ref | 1 | Ref |
| *>3* | 1,397 | 59 (4.2%) | 4.24 (2.53-7.07) | <0.001 | 2.06 (1.11-3.80) | 0.021 |
| Urogenital chlamydia |  |  |  |  |  |  |
| *Negative* | 2,922 | 73 (2.5%) | - | - |  |  |
| *Positive* | 196 | 0 (0%) | - | - |  |  |

^Of any gender within the last 12 months

§Total values in these categories don’t match total number due to missing data
